# Supplementary material for: Robust reverse-electrowetting based energy harvesting on slippery surface
Source: Royal Society of Chemistry journal article supplement (doi:10.1039/d3ra06099c), 2023-01-01
Supplement: d3ra06099c1.pdf [file d3ra06099c1.pdf]

## Supplementary Information

### Robust Reverse-Electrowetting Based Energy Harvesting on Slippery Surface

*Haimei Cheng<sup>1,2</sup>, Wan Shao<sup>1,2</sup>, Jing Jin<sup>1,2</sup>, Junjun Wu<sup>1,2</sup>, Manhong Zhao<sup>1,2</sup>, Biao Tang<sup>1,2\*</sup>, Guofu Zhou<sup>1,2,3</sup>*

<sup>1</sup> Guangdong Provincial Key Laboratory of Optical Information Materials and Technology &

Institute of Electronic Paper Displays, South China Academy of Advanced Optoelectronics, South

China Normal University, Guangzhou 510006, People's Republic of China

<sup>2</sup> National Center for International Research on Green Optoelectronics, South China Normal

University, Guangzhou 510006, People's Republic of China

<sup>3</sup> Shenzhen Guohua Optoelectronics Tech. Co. Ltd, Shenzhen 518110, People's Republic of China

Corresponding author. E-mail: tangbiao@scnu.edu.cn

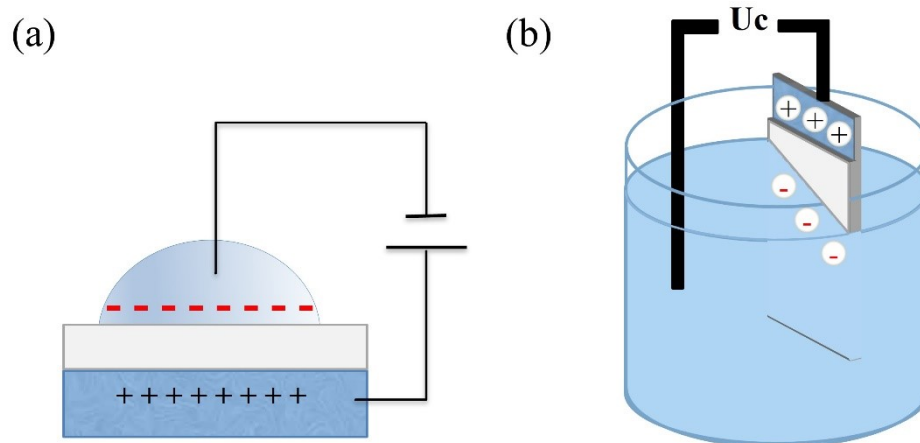

**Figure S1.** Experimental principle and schematic diagram of charge trapping (a) charge trapping principle, (b) schematic diagram of charge trapping.

The charge capture zone should be the entire surface of the sample, and the charge should be uniformly caught. Because the three-phase contact line is a straight line, the sample is immersed into the container uniformly so that all the surface is completed charge trapped.

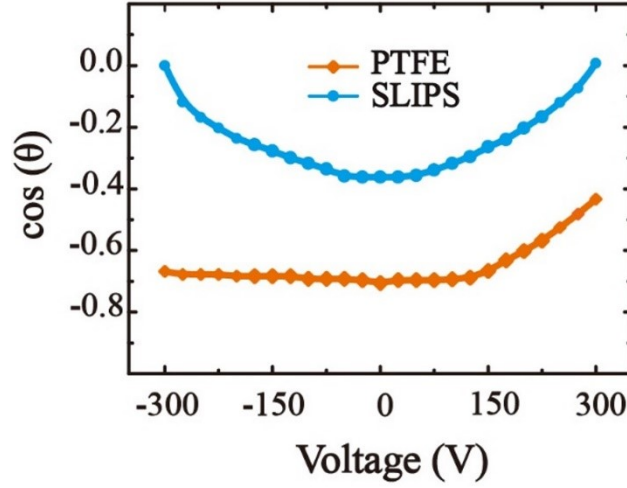

**Figure S2.** Charge trapping test: electrowetting curve of SLIPS and PTFE.

The presence of trapped charge on the surface of the dielectric layer results in the electrowetting equation satisfying the optimized Young-Lippmann equation<sup>1</sup>:

$$\cos \theta_v = \cos \theta_Y + \frac{\epsilon_0 \epsilon_r}{2d\gamma} (U - U_T)^2 \quad (1)$$

$$\sigma_T = \frac{\epsilon_0 \epsilon_r U_T}{d} \quad (2)$$

where  $\epsilon_0$  is the vacuum dielectric constant,  $\epsilon_r$  and  $d$  represent the dielectric constant and thickness of the insulating dielectric layer, respectively. Under the action of the electrowetting force, the contact angle of the droplet decreases from the initial contact angle  $\theta_Y$ , and finally the system reaches a new equilibrium state, where the contact angle of the droplet is  $\theta_v$ ,  $U_T$  is the potential difference generated by the trapped charge, and  $\sigma_T$  is the density of the trapped charge. Following the electrowetting experiment, the experimental data was fitted using the electrowetting equation (1), thus  $U_T$  was obtained, and the positive and negative values of  $U_T$  represented the polarity of the trapped charge. The SLIPS is  $-63.33$  V. The PTFE is  $-223.24$  V. Then the charge entrapment is  $-0.059$  mC/m<sup>2</sup> for SLIPS and  $-0.208$  mC/m<sup>2</sup> for PTFE according to formula (2).

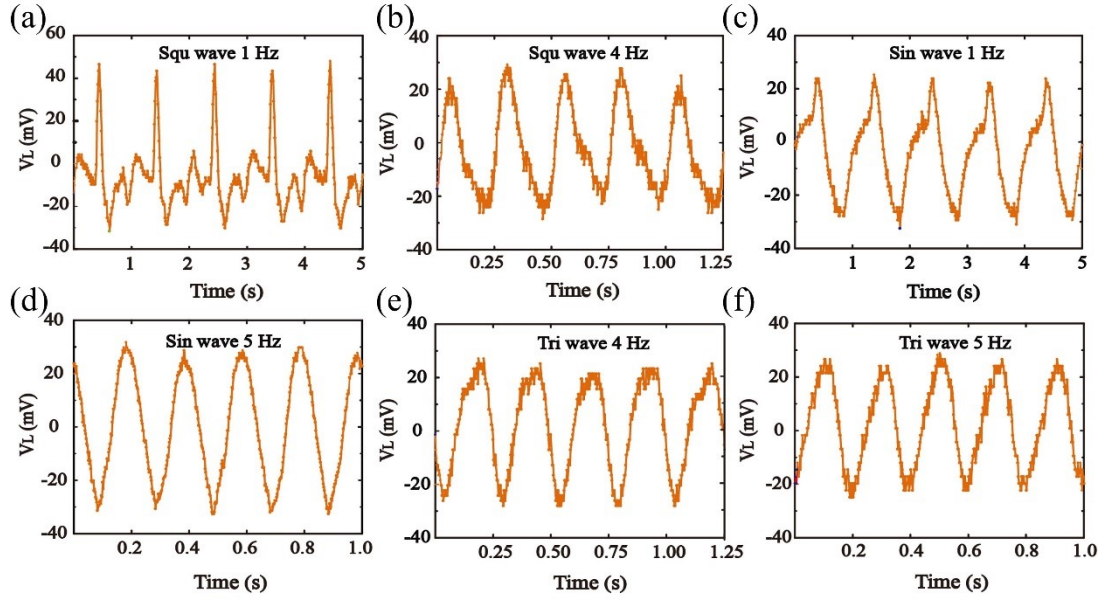

**Figure S3.** The instantaneous voltage output on the load  $V_L$  response to the form (square, sine and triangular) and frequency of the driving waveform applied on vibrator. For all graphs the droplet volume is 10  $\mu\text{L}$  with oscillation amplitude  $L = 1.2$  mm,  $R_L = 10$  M $\Omega$  and bias voltage  $V = 20$  V.

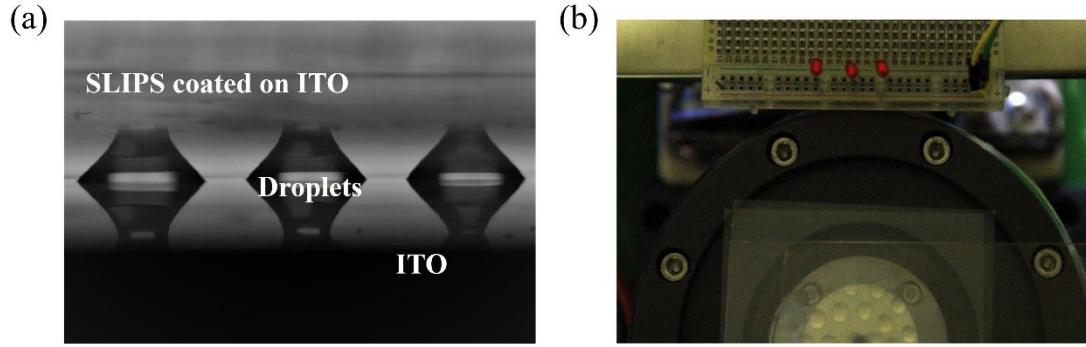

**Figure S4.** Application of REWOD-DEG based on SLIPS. (a) Experimental setup for enhanced power generation, (b) LEDs are lit up using 30 bridges for a sinusoidal input with  $f = 30$  Hz, bias voltage  $V = 200$  V. Total volume of droplets is about  $300 \mu\text{L}$ . The threshold voltage of the red LED is  $1.8$  V.

Through experiments, we demonstrate that the power output of a single droplet is more than  $100$  nW, therefore we need to think about increasing the power output to drive the device. Obviously, in REWOD-DEG, it can be improved by increasing the bias voltage and the contact area between the conducting droplet and the dielectric layer. Therefore, we use the droplet array to generate electricity while increasing the bias voltage.

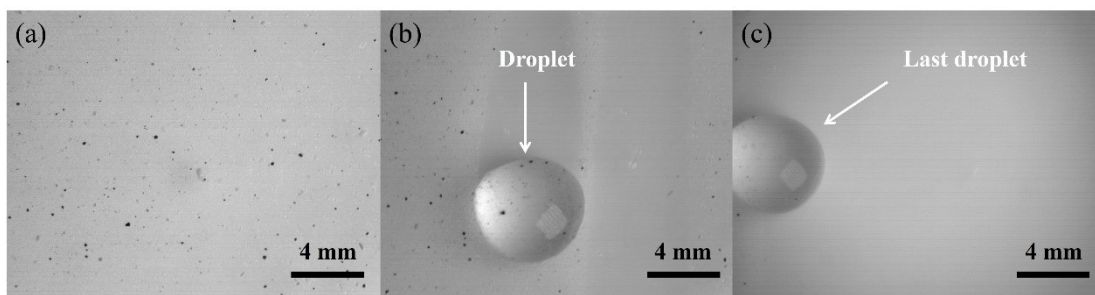

**Figure S5.** Self-cleaning property. (a) SLIPS is polluted with colored dust, (b) the droplet sliding cleans the surface, (c) SLIPS restore clean surface.

The fully hydrophobic nature of our SLIPS also helps protect the surface from various particulate contaminants, allowing for self-cleaning through a variety of fluids that collect and remove particles from the surface.

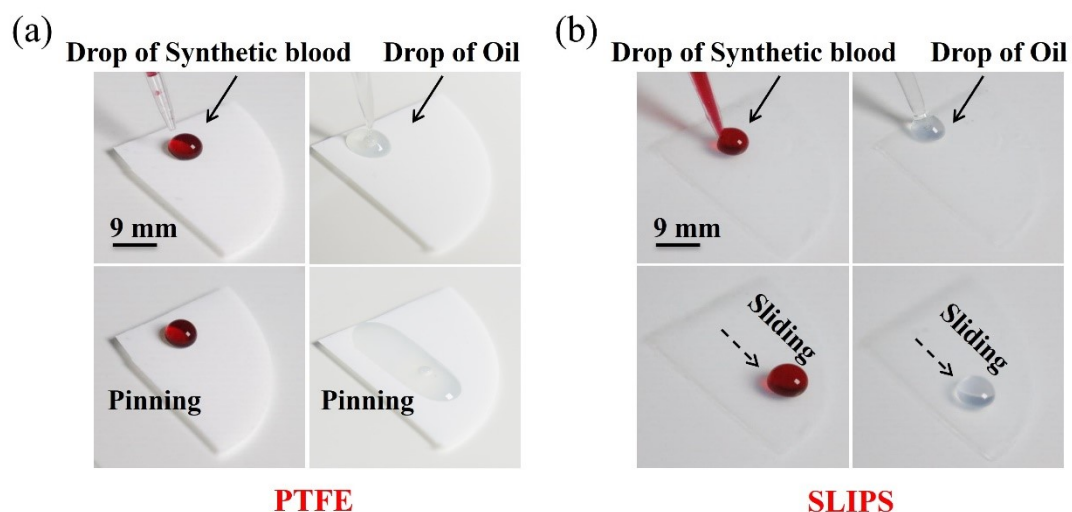

**Figure S6.** Repellency of complex fluids by SLIPS. (a) artificial blood and canola oil showed pinning phenomenon on PTFE surface, (b) artificial blood and canola oil slide across SLIPS.

In addition to repelling pure forms of liquid, SLIPS are also effective at repelling complex fluids, such as blood and canola oil, which quickly moisten and stain most existing surfaces.

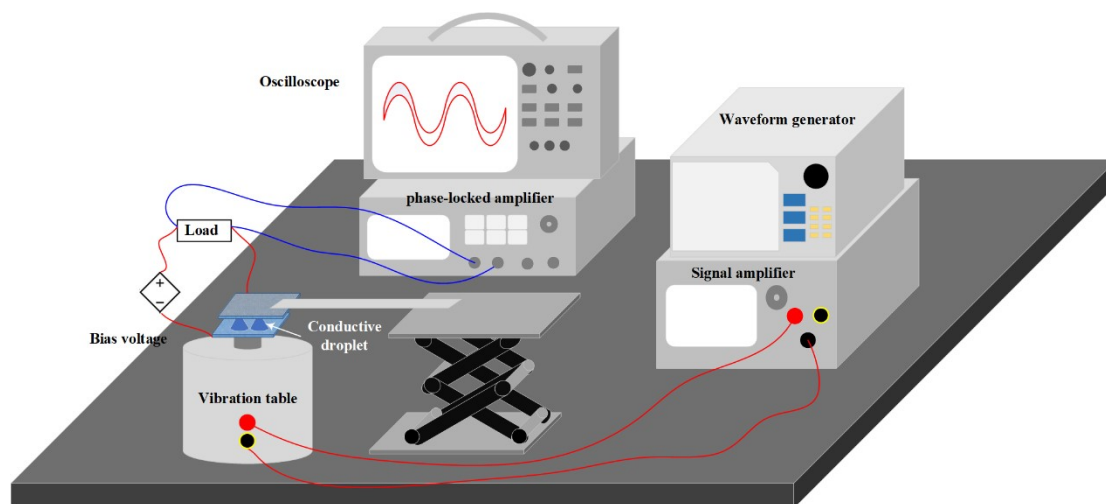

**Figure S7.** Schematic diagram of experimental setup for vibration mechanical energy harvesting based on REWOD-DEG

## REFERENCES

1. Verheijen HJJ, Prins MWJ. Reversible electrowetting and trapping of charge: model and experiments. *Langmuir*. 1999;15:6616-6620.
